# Supplementary material for: Identifying Prescription-Opioid-Related Risks Using Prescription Drug Monitoring Programs’ Algorithms and Clinical Screening Tools
Source: MDPI journal article supplement (doi:10.3390/pharmacy11050164), 2023-10-13
Supplement: s1 [file s1]

| Patient<br>with ROOM<br>risk<br>indicators<br>n=94 | Specific ROOM risk indicators |                                 |                    |                          | Any PDMP<br>alert n=46 | Specific PDMP alert           |                                       |                                         |
|----------------------------------------------------|-------------------------------|---------------------------------|--------------------|--------------------------|------------------------|-------------------------------|---------------------------------------|-----------------------------------------|
|                                                    | Severe pain<br>n= 65          | Opioid use<br>disorder<br>n= 37 | Depression<br>n=27 | Risky<br>Alcohol<br>n=45 |                        | High dose<br>>100 OME<br>n=16 | Medium<br>dose 50-<br>100 OME<br>n=28 | High risk<br>drug<br>combination<br>n=5 |
|                                                    |                               |                                 |                    |                          |                        |                               |                                       |                                         |
|                                                    |                               |                                 |                    |                          |                        |                               |                                       |                                         |
|                                                    |                               |                                 |                    |                          |                        |                               |                                       |                                         |
|                                                    |                               |                                 |                    |                          |                        |                               |                                       |                                         |
|                                                    |                               |                                 |                    |                          |                        |                               |                                       |                                         |
|                                                    |                               |                                 |                    |                          |                        |                               |                                       |                                         |
|                                                    |                               |                                 |                    |                          |                        |                               |                                       |                                         |
|                                                    |                               |                                 |                    |                          |                        |                               |                                       |                                         |
|                                                    |                               |                                 |                    |                          |                        |                               |                                       |                                         |
|                                                    |                               |                                 |                    |                          |                        |                               |                                       |                                         |
|                                                    |                               |                                 |                    |                          |                        |                               |                                       |                                         |
|                                                    |                               |                                 |                    |                          |                        |                               |                                       |                                         |
|                                                    |                               |                                 |                    |                          |                        |                               |                                       |                                         |
|                                                    |                               |                                 |                    |                          |                        |                               |                                       |                                         |
|                                                    |                               |                                 |                    |                          |                        |                               |                                       |                                         |
|                                                    |                               |                                 |                    |                          |                        |                               |                                       |                                         |
|                                                    |                               |                                 |                    |                          |                        |                               |                                       |                                         |
|                                                    |                               |                                 |                    |                          |                        |                               |                                       |                                         |
|                                                    |                               |                                 |                    |                          |                        |                               |                                       |                                         |
|                                                    |                               |                                 |                    |                          |                        |                               |                                       |                                         |
|                                                    |                               |                                 |                    |                          |                        |                               |                                       |                                         |
|                                                    |                               |                                 |                    |                          |                        |                               |                                       |                                         |
|                                                    |                               |                                 |                    |                          |                        |                               |                                       |                                         |
|                                                    |                               |                                 |                    |                          |                        |                               |                                       |                                         |
|                                                    |                               |                                 |                    |                          |                        |                               |                                       |                                         |
|                                                    |                               |                                 |                    |                          |                        |                               |                                       |                                         |
|                                                    |                               |                                 |                    |                          |                        |                               |                                       |                                         |
|                                                    |                               |                                 |                    |                          |                        |                               |                                       |                                         |
|                                                    |                               |                                 |                    |                          |                        |                               |                                       |                                         |
|                                                    |                               |                                 |                    |                          |                        |                               |                                       |                                         |
|                                                    |                               |                                 |                    |                          |                        |                               |                                       |                                         |
|                                                    |                               |                                 |                    |                          |                        |                               |                                       |                                         |
|                                                    |                               |                                 |                    |                          |                        |                               |                                       |                                         |
|                                                    |                               |                                 |                    |                          |                        |                               |                                       |                                         |
|                                                    |                               |                                 |                    |                          |                        |                               |                                       |                                         |
|                                                    |                               |                                 |                    |                          |                        |                               |                                       |                                         |
|                                                    |                               |                                 |                    |                          |                        |                               |                                       |                                         |
|                                                    |                               |                                 |                    |                          |                        |                               |                                       |                                         |
|                                                    |                               |                                 |                    |                          |                        |                               |                                       |                                         |
|                                                    |                               |                                 |                    |                          |                        |                               |                                       |                                         |
|                                                    |                               |                                 |                    |                          |                        |                               |                                       |                                         |
|                                                    |                               |                                 |                    |                          |                        |                               |                                       |                                         |
|                                                    |                               |                                 |                    |                          |                        |                               |                                       |                                         |
|                                                    |                               |                                 |                    |                          |                        |                               |                                       |                                         |
|                                                    |                               |                                 |                    |                          |                        |                               |                                       |                                         |
|                                                    |                               |                                 |                    |                          |                        |                               |                                       |                                         |
|                                                    |                               |                                 |                    |                          |                        |                               |                                       |                                         |
|                                                    |                               |                                 |                    |                          |                        |                               |                                       |                                         |
|                                                    |                               |                                 |                    |                          |                        |                               |                                       |                                         |
|                                                    |                               |                                 |                    |                          |                        |                               |                                       |                                         |
|                                                    |                               |                                 |                    |                          |                        |                               |                                       |                                         |
|                                                    |                               |                                 |                    |                          |                        |                               |                                       |                                         |
|                                                    |                               |                                 |                    |                          |                        |                               |                                       |                                         |
|                                                    |                               |                                 |                    |                          |                        |                               |                                       |                                         |
|                                                    |                               |                                 |                    |                          |                        |                               |                                       |                                         |
|                                                    |                               |                                 |                    |                          |                        |                               |                                       |                                         |
|                                                    |                               |                                 |                    |                          |                        |                               |                                       |                                         |
|                                                    |                               |                                 |                    |                          |                        |                               |                                       |                                         |
|                                                    |                               |                                 |                    |                          |                        |                               |                                       |                                         |
|                                                    |                               |                                 |                    |                          |                        |                               |                                       |                                         |
|                                                    |                               |                                 |                    |                          |                        |                               |                                       |                                         |
|                                                    |                               |                                 |                    |                          |                        |                               |                                       |                                         |
|                                                    |                               |                                 |                    |                          |                        |                               |                                       |                                         |
|                                                    |                               |                                 |                    |                          |                        |                               |                                       |                                         |
|                                                    |                               |                                 |                    |                          |                        |                               |                                       |                                         |
|                                                    |                               |                                 |                    |                          |                        |                               |                                       |                                         |
|                                                    |                               |                                 |                    |                          |                        |                               |                                       |                                         |
|                                                    |                               |                                 |                    |                          |                        |                               |                                       |                                         |
|                                                    |                               |                                 |                    |                          |                        |                               |                                       |                                         |
|                                                    |                               |                                 |                    |                          |                        |                               |                                       |                                         |
|                                                    |                               |                                 |                    |                          |                        |                               |                                       |                                         |
|                                                    |                               |                                 |                    |                          |                        |                               |                                       |                                         |
|                                                    |                               |                                 |                    |                          |                        |                               |                                       |                                         |
|                                                    |                               |                                 |                    |                          |                        |                               |                                       |                                         |
|                                                    |                               |                                 |                    |                          |                        |                               |                                       |                                         |
|                                                    |                               |                                 |                    |                          |                        |                               |                                       |                                         |
|                                                    |                               |                                 |                    |                          |                        |                               |                                       |                                         |
|                                                    |                               |                                 |                    |                          |                        |                               |                                       |                                         |
|                                                    |                               |                                 |                    |                          |                        |                               |                                       |                                         |
|                                                    |                               |                                 |                    |                          |                        |                               |                                       |                                         |
|                                                    |                               |                                 |                    |                          |                        |                               |                                       |                                         |
|                                                    |                               |                                 |                    |                          |                        |                               |                                       |                                         |
|                                                    |                               |                                 |                    |                          |                        |                               |                                       |                                         |
|                                                    |                               |                                 |                    |                          |                        |                               |                                       |                                         |
|                                                    |                               |                                 |                    |                          |                        |                               |                                       |                                         |
|                                                    |                               |                                 |                    |                          |                        |                               |                                       |                                         |
|                                                    |                               |                                 |                    |                          |                        |                               |                                       |                                         |
|                                                    |                               |                                 |                    |                          |                        |                               |                                       |                                         |
|                                                    |                               |                                 |                    |                          |                        |                               |                                       |                                         |
|                                                    |                               |                                 |                    |                          |                        |                               |                                       |                                         |
|                                                    |                               |                                 |                    |                          |                        |                               |                                       |                                         |

\* each line represents an individual patient (n=119)
